# 1 Prediction and validation of host cleavage targets of SARS-CoV-2 3C- 2 like protease

3  
4

5 Nora Yucel<sup>1</sup>, Silvia Marchiano<sup>2,3,4</sup>, Evan Tchelepi<sup>5</sup>, Germana Paterlini<sup>6</sup>, Quentin McAfee<sup>1</sup>, Nehaar  
6 Nimmagadda<sup>1</sup>, Andy Ren<sup>1</sup>, Sam Shi<sup>1</sup>, Charles Murry<sup>2,3,4,7,8,9</sup>, Zoltan Arany<sup>1</sup>

7

8 <sup>1</sup>Cardiovascular Institute, Perelman School of Medicine, University of Pennsylvania, Philadelphia  
9 PA 19104

10 <sup>2</sup>Institute for Stem Cell and Regenerative Medicine, University of Washington, 850 Republican  
11 Street, Brotman Building Room 453, Seattle, WA 98109, USA.

12 <sup>3</sup>Center for Cardiovascular Biology, University of Washington, Seattle, WA 98109, USA

13 <sup>4</sup>Department of Laboratory Medicine & Pathology, University of Washington, Seattle, WA  
14 98195, USA

15 <sup>5</sup>NetQuest Corporation, 523 Fellowship Rd Suite 205, Mt Laurel Township, NJ 08054

16 <sup>6</sup>Certusoft, 8500 Normandale Blvd, #980, Bloomington, MN, 55437

17 <sup>7</sup>Division of Cardiology, Department of Medicine, University of Washington, Seattle, WA  
18 98195, USA

19 <sup>8</sup>Sana Biotechnology, Seattle, WA 98102, USA

20 <sup>9</sup>Department of Bioengineering, University of Washington, Seattle, WA 98195, USA

21

22 Corresponding:

23 Zoltan Arany MD PhD

24 Professor in Medicine

25 Perelman School of Medicine

26 University of Pennsylvania

27 Smilow Center for Translational Research

28 11th floor

29 3400 Civic Blvd

30 Philadelphia 19104

31 Administrative assistant:

32 Emily Romick

33

34

## 35 Abstract

36 How SARS-CoV-2 causes the observed range of clinical manifestations and disease severity

37 remains poorly understood. SARS-CoV-2 encodes for two proteases (3CLPro and PLPro), vital for

38 viral production, but also promiscuous with respect to host protein targets, likely contributing

39 to the range of disease. Pharmacological inhibition of the 3C-like3 protease has revealed

40 remarkable reduction in hospitalization and death in phase 2/3 clinical studies. However, the

41 mechanisms responsible for the pathology mediated by those proteases are still unclear. In this  
42 study, we develop a bioinformatic algorithm, leveraging experimental data from SARS-CoV, to  
43 predict host cleavage targets of the SARS-CoV-2 3C-like protease, or 3CLPro. We capture targets  
44 of the 3CL protease described previously for SARS-CoV, and we identify hundreds of new  
45 putative targets. We experimentally validate a number of these predicted targets, including the  
46 giant sarcomeric protein Obscurin, and show that expression of 3CL protease alone  
47 recapitulates the sarcomeric disorganization seen by SARS-CoV-2 infection of hiPSC-derived  
48 cardiomyocytes. Our data provide a resource to identify putative host cleavage targets of 3CL  
49 protease that contribute to mechanisms and heterogeneity of disease in COVID-19 and future  
50 coronavirus outbreaks.

51

## 52 **Introduction**

53 COVID-19 continues to be a leading cause of death and morbidity across the world since the  
54 initial outbreak in Wuhan, China December 2019<sup>1</sup>. How SARS-CoV-2, the causative agents of  
55 COVID19, leads to its wide range of disease manifestations remains incompletely understood.  
56 In addition to lung damage, SARS-CoV-2 infection can also cause kidney damage, clotting  
57 disorders, loss of taste and smell, cognitive dysfunction, muscle atrophy, and cardiac  
58 dysfunction<sup>2-5</sup>. In addition, long-lasting COVID-19 symptoms have been reported in patients up  
59 to a year after initial illness, including fatigue, shortness of breath, brain fog, and elevated heart  
60 rate<sup>6,7</sup>. It remains unclear how SARS-CoV-2 affects differently the multiple organs and cell types  
61 involved. Nor it is known what host characteristics determine who will develop severe COVID-

62 19, which organs will be affected, or whether long COVID will ensue. A deeper mechanistic  
63 understanding of virus-host interactions is thus needed.

64

65 Various studies have identified host interaction partners of many SARS-CoV-2 proteins,  
66 including the spike, envelope, nucleocapsid, and membrane proteins<sup>8-10</sup>. These interactions  
67 have various consequences, including suppression of innate immune response, suppression of  
68 apoptosis, and reprogramming of host transcription and translation. In addition to protein-  
69 protein interactions, important virus-host interactions can be caused by enzymatic cleavage of  
70 host proteins by viral proteases. For example, myocardial dysfunction following infection by  
71 coxsackie CVB3 virus can in part be ascribed to cleavage of dystrophin protein by the viral  
72 protease 2A<sup>11,12</sup>; enteroviral 3C proteases can cleave host NLRP1 to trigger inflammasome  
73 activation<sup>13</sup>; HIV-1 protease mediates apoptosis by cleaving host procaspase 9 and Bcl2<sup>14,15</sup>;  
74 and the Zika virus nsP2 cysteine protease can cleave host proteins SFRP1 NT5M, and FOXG1<sup>16</sup>.

75

76 SARS-CoV-2 encodes for two proteases, a papain-like protease (PLPro) and the 3C-like protease  
77 (3CLPro, also known as main Protease, MPro, or NSP5) . These proteases are highly conserved  
78 across coronavirus species and are absolutely required for viral replication<sup>17-20</sup>. Both proteases  
79 are thus actively being investigated as targets for antivirals<sup>21</sup>. Recent Phase2/3 clinical trial  
80 results with PF-07323332, a 3CL inhibitor, administered in combination with ritonavir, revealed  
81 89% reduction in hospitalization with COVID-19<sup>22</sup>. Both PLPro and 3CLPro are generated via  
82 autocatalytic cleavage from the overlapping ORF1a and ORF1ab polyproteins, the first  
83 translation products following SARS-CoV-2 infection. The ORF1a/ab polyproteins encode 16

84 non-structural proteins (NSP1-16) that build the viral replication machinery (**Fig 1A**). The  
85 nonstructural proteins are liberated from the ORF1a/ab polyprotein through cleavage by PLPro  
86 and 3CLPro, encoded by NSP3 and NSP5, respectively. Following this processing PLPro remains  
87 bound to the endoplasmic reticulum membrane, while 3CLPro cleaves itself free, giving it  
88 access to the full cytosolic compartment. The impact of these proteases on the host proteome,  
89 and in particular the 3CLPro, remains poorly defined. Targeted screening of 300 interferon-  
90 stimulated proteins in cell lines overexpressing SARS-CoV-2 3CLPro identified RNF20 as a target  
91 of 3CLpro<sup>23</sup>. In a different screening of 71 immune pathway-related proteins, IRF3 was  
92 identified as target of PLpro and NLRP12 and TAB1 as targets of 3CLpro, suggesting the role of  
93 those proteases in the innate immune response to the virus <sup>24</sup>.

94

95 Only limited efforts have thus far been taken to identify systematically, and in unbiased fashion,  
96 host cleavage targets of 3CLPro from SARS-CoV-2. Given the high conservation of 3CLPro, such  
97 analysis would extend as well across coronavirus species. One approach taken recently used N-  
98 terminomics to identify neo-N-termini generated by the viral proteases, and identified 14 new  
99 cellular substrates <sup>25</sup> and more than 100 substrates in a second study <sup>26</sup>. This approach is  
100 limited, however, by the need for sufficient protein abundance and appropriate fragment size  
101 and properties to be detected by mass spectrometry <sup>27,28</sup>. Only 3 cleavage targets have been  
102 identified by more than one study to date (TAB1, ATAD2 and NUP107), reflecting the lack of  
103 saturation of these approaches. Moreover, cleaved proteins that are subsequently degraded (a  
104 process accelerated by infection) <sup>29,30</sup> also escape detection by N-terminomics, as do proteins  
105 not expressed by the cell types used experimentally. *In silico* approaches provide the

106 opportunity to overcome these numerous limitations, and to avoid laborious experimental  
107 screens. An initial such approach relied on similarity between cleavage sites in the viral  
108 polypeptide across divergent coronavirus species (NetCorona1.0)<sup>31</sup>. However, this method  
109 generates scores using assumptions about the viral cleavage site that do not apply to the SARS-  
110 CoV-2 consensus sequence. For example, NetCorona1.0 predicts that a sequence containing a  
111 proline at the P2' position can be cleaved, but this substitution has been shown to block  
112 cleavage in cleavage assays<sup>32</sup>. In addition, NetCorona1.0 does not consider cleavage site  
113 accessibility conferred by secondary structure, the relative efficiency of cleavage at different  
114 sites, or the possibility that there may be host target sites of higher affinity than viral sites.

115  
116 Here we combine published cleavage efficiency data on the SARS-CoV 3CLPro, which is 96%  
117 similar to SARS-CoV-2 3CLpro<sup>33</sup>, with genome-wide secondary structure analyses, to identify  
118 and score 99,000+ predicted SARS-CoV/SARS-CoV-2 3CLPro cleavage sites across the human  
119 proteome. Through score filtration and secondary structure analysis, we identify over 1000 high  
120 likelihood sites. We re-discover nearly all prior SARS-CoV-2 3CLPro experimentally identified  
121 sites, and we validate newly identified targets with purified reagents and in cell culture.

122 Focusing on cardiomyocyte-specific hits, we show 3CLPro leads to cleavage and degradation of  
123 the sarcomeric protein obscurin (OBSCN) in human induced pluripotent cell-derived  
124 cardiomyocytes (hiPSC-CM), and recapitulates the sarcomeric disorganization observed with  
125 SARS-CoV-2 infection of hiPSC-CMs<sup>34-36</sup>. Our study provides a comprehensive atlas for  
126 identifying the degradome of 3CL proteases, applicable to SARS-CoV-2 and, in light of the

127 structural conservation of the 3CL protease across coronavirus species<sup>37</sup>, future coronavirus  
128 outbreaks.

129

### 130 **Bioinformatic prediction of SARS-CoV-2 3CLPro targets using experimental data from SARS-** 131 **CoV 3CLPro**

132

133 We first sought to identify and score potential cleavage targets of the 3CLpro encoded by SARS-  
134 COV-2. Given the 96% sequence similarity between 3CLPro from SARS-CoV-2 as well as the  
135 homology in the viral genome cut sites<sup>17,33,37</sup>, we developed an algorithm based on  
136 experimental data generated previously from SARS-CoV (2003) 3CLPro<sup>32</sup>. In this previous study,  
137 FRET polypeptides spanning the first endogenous cut site between NSP4 and NSP5 (P5-  
138 SAVLQSGF-P3') were generated and modified with every possible single amino acid substitution  
139 from P5 to P3' position relative to the cleavage site. Cleavage efficiency by 3CLpro was then  
140 assessed by fluorescence intensity compared to the consensus cleavage sequence. We  
141 leveraged this data set to generate a score for every possible cleavage site using a lookup table,  
142 multiplying the relative efficiency of each amino acid. This multiplication was then applied with  
143 a sliding 8-amino acid windows across the entire human proteome (**Fig 1B**). Substitution at any  
144 site that showed no detectable cleavage was interpreted as "0". Assuming a glutamine (Q) in  
145 the P1 position, over 98,697 scored sites (>0) were identified. Expanding our search to include  
146 methionine (M) or histidine (H) at P1 uncovered a total of 195,684 sites with a median score of  
147 0.0008 (**Fig 1C**) (**Supplemental Table 1**). GO analysis of scores in the top 15% (>0.01) showed

148 an enrichment for cell-adhesion, morphogenesis and cytoskeletal genes (**Supplemental Table**  
149 **2**). We named the algorithm Sarsport1.0.

150  
151 To evaluate the precision of Sarsport1.0, we calculated scores for the 11 known 3CLPro cut sites  
152 in the SARS-CoV viral genome. Scores ranged from 1.31 – 0.04, all within the upper 5<sup>th</sup>  
153 percentile of the score range. These scores were then compared with the published relative  
154  $K_{cat}/K_m$  values for each cleavage site<sup>38</sup>. With the exception of the cut-site between NSP9 and  
155 NSP10 (ATVRLQ\*AGNAT), our calculated score correlated closely with relative  $K_{cat}/K_m$  (**Fig 1D**  
156 left). In contrast, there was essentially no correlation between NetCorona1.0 scores and  
157 relative  $K_{cat}/K_m$  (**Fig 1D**, right).

158  
159 To evaluate the sensitivity of Sarsport1.0 to identify SARS-CoV-2 host protein targets, we next  
160 calculated scores for the >100 recently published experimentally-identified SARS-CoV-2 3CLPro  
161 cleavage targets. Sarsport1.0 identified 104 of 117 sites, including those with non-canonical  
162 methionine or histidine at the P1 position (**Fig 1C**). The median score was over 0.1, which is  
163 within the top 2.5% of all scores. Receiver operator curve (ROC) analysis (**Fig 1E**) showed  
164 Sarsport1.0 to be highly predictive, with an area under the curve of 0.9473, and  $P < 0.0001$ . This  
165 is likely an underestimate of true ROC, because true positives were likely missed in the  
166 experimental approaches. We conclude that Sarsport1.0 is highly predictive of cleavage sites by  
167 both SARS-CoV and SARS-CoV-2 3CLpro proteases.

168

169 **Refinement of cleavage prediction by secondary structure analysis**

170  
171 The unique high score but low  $K_{cat}/K_m$  of the NSP9/10 cleavage site (**Fig 1D**) suggested that a  
172 higher order structure, not captured by scoring based on primary sequence alone, might inhibit  
173 cleavage. We therefore estimated the secondary structure of each cut site in the viral genome,  
174 using the JPRED4 protein secondary structure prediction server<sup>39</sup> and a 100aa window spanning  
175 the P1 position. The NSP9/10 site in SARS-CoV was the only cleavage site where the P1 position  
176 (Q) was predicted to lie in a  $\beta$ -sheet (**Supplemental Table 3**). In contrast, the other sites all lay  
177 in predicted  $\alpha$ -helices or disordered regions, structures known to be more accessible to  
178 proteases<sup>40,41</sup>. These data suggested that higher order structures such as  $\beta$ -sheets hinder  
179 cleavage by 3CLpro.

180  
181 To further probe this possibility, we used JPRED4 to evaluate secondary structures around all  
182 predicted cleavage sites with a Q at P1 and with a Sarsport1.0 score  $>0.1$  (4416 sites) (**Fig 1F**)  
183 (**Supplemental Table 4**). The recent publication of predicted structures for most of the human  
184 proteome with AlphaFold<sup>42</sup> also provides the opportunity to cross validate secondary with  
185 higher order structure. The relative frequency of  $\beta$ -sheet structures at the P1 position of  
186 predicted cleavage sites was significantly less than the overall frequency of  $\beta$ -sheets for  
187 glutamines in the proteome<sup>43</sup> (**Fig 1G**), indicating that Sarsport1.0 partly biases away from  $\beta$ -  
188 sheets. Further comparison to published experimentally-identified cleavage sites revealed in  
189 the latter an additional significantly increased propensity for cleavage in regions where P1 (Q) is  
190 unstructured and in particular not in a  $\beta$ -sheet (**Fig 1F**). Thus, filtering results from Sarsport1.0  
191 for the absence of a  $\beta$ -sheet structure at P1 will improve its positive predictive value.



192 Interestingly, the median Sarsport1.0 score for sites that lie in unstructured regions (0.1024)  
193 was significantly lower than for sites that lie in  $\alpha$ -helices (0.1727) or  $\beta$ -sheets (0.27) (**Fig 1G**),  
194 suggesting that the presence less permissive secondary structural order imposes a higher  
195 evolutionary pressure for an optimal primary sequence cleavage motif.

196

### 197 **Cleavage validation of novel targets**

198

199 Because of the higher sensitivity of our method, we identified numerous new predicted  
200 cleavage sites, in addition to those previously published. Gene Ontology (GO) analysis of  
201 proteins with Sarsport1.0 score > 0.01 showed enrichment for many cell-adhesion proteins,  
202 including many predicted cleavage sites located within homologous cadherin domains in the  
203 cadherin protein superfamily (**Supplemental Table 2**). Evaluation with AlphaFold predicted  
204 these sites to be in unstructured accessible loops within the cadherin domain, thus making  
205 them likely to be cleaved if exposed to 3CLPro (**Fig 1G**). We validated these hits *in vitro* by  
206 incubation of purified 3CLPro with commercially available recombinant cadherin proteins  
207 (CDH6, CDH20), which have identical predicted sites (Score 0.145, Q203 and Q209, respectively,  
208 Fig/Table XX). 3CLPro efficiently cleaved both CDH6 and CDH20, yielding the expected fragment  
209 sizes based on the predicted cleavage site (**Fig 2A**). We similarly validated novel cleavage sites  
210 in thrombin (IIA) and in the intracellular domain of NOTCH1: *in vitro* reactions with purified  
211 proteins yielded expected fragment sizes for both (**Fig 2B-D**). The appearance of thrombin IIA  
212 cleaved product was inhibited by the 3CLpro inhibitor GC376, demonstrating the requirement  
213 of 3CLpro enzymatic activity (**Fig 2B**). Cleavage of NOTCH1 at a predicted site (Q2315, score

214 0.432), within the intracellular domain of NOTCH1, yielded both predicted fragments (**Fig 2C**).  
215 Overexpression of 3CLPro in hiPSC-CMs also yielded NOTCH1 fragments of predicted length,  
216 demonstrating cleavage in intact cells (**Fig 2D**). Additional targets chosen for their high score  
217 and secondary structure accessibility (SVIL, UACA, NOTCH2) were similarly validated with  
218 3CLPro overexpression in 293T cells, as was the previously published target TAB1  
219 (**Supplemental Fig 1A**). Interestingly, in these cell overexpression experiments, while the levels  
220 of full length target proteins were significantly reduced by expression of 3CLpro, the  
221 appearance of fragments of predicted size were not observed. We hypothesized that cytosolic  
222 fragments generated by 3CLPro may be further degraded by endogenous proteolytic pathways.  
223 Supporting this notion, the plasma-membrane bound N-terminal cleavage product of full length  
224 NOTCH1 yielded the expected 90kda fragment, while the C-terminal fragment only showed  
225 reduction in total protein (**Supplemental Fig 1B**). We conclude that 3CLPro can cleave a wide  
226 range of host proteins, and that the generated cytosolic protein fragments are likely often  
227 degraded by endogenous pathways.

228

### 229 **Cardiac targets of SARS-CoV-2 3CLPro show multiple cut sites across sarcomeric proteins**

230 Previous work has demonstrated disorganization of sarcomeres after SARS-CoV-2 infection of  
231 hiPSC-derived cardiomyocytes<sup>34–36,44</sup>. We hypothesized that 3CLPro may be degrading  
232 sarcomere proteins directly. Consistent with this notion, overexpression of 3CLPro, but not a  
233 catalytically inactive mutant (C145A), in hiPSC-CMs led to pronounced sarcomere breakdown  
234 within 48h (**Fig 3A**). At this 48h time point, we also observed numerous cells with a  
235 stereotypical intermediate phenotype, in which sarcomeres exhibited increased length, as

236 defined by the distance between alpha-actinin stained Z-discs (**Fig 3B-C**), suggesting that a key  
237 structural protein of the sarcomere is being targeted by 3CLpro.

238  
239 We applied our *in silico* primary and secondary analysis to identify putative sarcomere targets  
240 of 3CLpro (**Supplemental Table 5**). Within this list, we identified the giant protein Obscurin  
241 (OBSCN) as a probable target, with 5 high-likelihood sites along the length of the ~800kda  
242 (>7500 amino acids) protein (**Fig 4A**). Consistent with these data, hiPSC CMs expressing 3CLpro  
243 had a marked reduction in Obscurin protein, compared to cells expressing the C145A mutant  
244 (**Fig4B-C**). The reduction was apparent using antibodies against multiple epitopes along this  
245 large protein. In contrast, levels of alpha-actinin (ACTN2) and myosin heavy chain (MYH6),  
246 which our algorithm did not predict to be cleaved by 3CLpro, were not altered (**Fig 4B**). In  
247 addition, immunocytochemistry showed loss of Obscurin in otherwise apparently intact, alpha-  
248 actinin-positive sarcomeres in cells expressing 3CLPro, but not cells expressing C145A (**Fig 4C**).

249  
250 As with a number of targets described above (**Supplemental Fig 1**) we did not detect any  
251 Obscurin fragments, despite using antibodies that recognize multiple epitopes along the length  
252 of the protein. To test whether the absence of fragments might be due to endogenous  
253 proteasome activity, we treated cardiomyocytes expressing 3CLPro, versus C145A, with the  
254 proteasome inhibitor MG132, and collected cellular protein 24h later. Blotting with the two  
255 antibodies that recognize the region between cut sites 3 and 4 (Q4075 and Q5488, respectively)  
256 yielded the expected fragment size (~155kda) (**Fig 4D**), validating the predicted sites as a  
257 3CLpro targets, and demonstrating that the ensuing fragment is targeted for degradation by the

258 proteasome. Identification of other fragments within Obscurin was technically unfeasible due  
259 to either lack of antibodies against the specific region, or to overlap with non-specific bands on  
260 blots. However, we also observed the appearance, after proteasome inhibition, of fragments of  
261 predicted size in Supervillin (SVIL), another giant sarcomeric protein predicted to be targeted by  
262 our algorithm, as well as TAB1, which was previously shown to be targeted by 3CLpro but for  
263 which no fragments had been detected<sup>24</sup>

264

### 265 **Obscurin degradation in SARS-CoV-2 infection**

266 Finally, we tested if those results were recapitulated in a model of hPSC-CMs infected with live  
267 SARS-CoV-2. For these experiments, we used two hPSC-CM lines, WTC-11c (hiPSC-CMs) and H7  
268 (hESC-CMs, human embryonic stem cell-derived cardiomyocytes), previously used to study the  
269 effects of SARS-CoV-2 on human cardiomyocytes<sup>35</sup>. Within 48h of infection, coincident with the  
270 robust appearance of viral nucleocapsid, total Obscurin protein gradually reduced by 40-60%  
271 (**Fig 5A-B**). In contrast, protein abundance of ACTN2, MYH6, and MYH7 was unaffected by  
272 infection (**Fig 5B**), mirroring the effects seen with 3CLpro alone (**Fig 4B**). Similarly,  
273 immunocytochemistry of infected cells showed reduction of Obscurin staining in cells  
274 expressing viral nucleocapsid, despite seemingly intact sarcomeres (TNNT2 staining), again  
275 mirroring the effects seen with 3CLpro alone (**Fig 4D**). Thus the loss of Obscurin caused by  
276 3CLpro-mediated cleavage might explain the loss of sarcomere integrity during SARS-CoV-2  
277 infection in human cardiomyocytes.

278

### 279 **Discussion**

280 We leveraged here experimental data and genome-wide secondary structure analyses to  
281 develop a reliable computational algorithm, Sarsport1.0, that predicts endogenous non-viral  
282 cleavage targets by the 3CLpro SARS-CoV-2 protease across the human proteome. We validated  
283 the precision of the algorithm by confirming novel predicted cleavage sites, using both  
284 biochemical and cell culture approaches. The algorithm is specific: all 8 predicted host proteins  
285 that we chose to test experimentally confirmed cleavage by 3CLpro. The algorithm is also  
286 precise, accurately correlating scores with the known  $K_m/K_{cat}$  values for the cut sites in the  
287 single viral polypeptide. The single exception to this correlation, the NSP9/10 site, is also the  
288 only site lying within a predicted beta-sheet, which likely hinders protease access. The  
289 particularly high score of the NSP9/10 site (score = 1.31) may have evolved to overcome this  
290 more inaccessible higher order structure.

291  
292 Finally, the algorithm is highly sensitive, accurately predicting high cut scores in nearly all  
293 previously experimentally identified 3CLpro sites<sup>23–26</sup>. In addition, thousands of novel sites are  
294 predicted to be cleaved by 3CLpro. Numerous reasons likely explain why the computational  
295 algorithm is more sensitive than prior experimental approaches: (1) experimental paradigms  
296 are limited to detecting the proteins expressed in the chosen experimental cells; (2) proteomic  
297 approaches rely on the ability to detect new protein fragments by mass spectrometry, a  
298 relatively insensitive method; (3) and proteomic approaches also require the physical presence  
299 of cleaved products, but as shown here, these fragments are often quickly degraded after  
300 cleavage. Our computational algorithm overcomes these limitations and provides a  
301 comprehensive atlas of the putative SARS-CoV-2 3CLpro degradome.

302

303 The SARS-CoV-2 3CLpro is the target of ongoing therapeutic efforts to treat COVID-19. Recent  
304 interim analysis of the phase 2/3 EPIC-HR (Evaluation of Protease Inhibition for COVID-19 in  
305 High-Risk Patients)<sup>22</sup>, which tested the combination therapy of PF-07321332, a 3CLpro inhibitor,  
306 with ritonavir, a CYP3A4 inhibitor that prevents the metabolism of protease inhibitors, reported  
307 a nearly 90% reduction in hospitalization or death compared to placebo in non-hospitalized  
308 high-risk adults with COVID-19 ( $P < 0.0001$ ). Our data suggest that these remarkable benefits of  
309 3CLpro inhibition may accrue from effects beyond suppression of viral replication. For example,  
310 infected cells that do not sustain replication may nevertheless experience significant cellular  
311 damage from 3CLpro activity on the host proteome, and PF-07321332 and other 3CLpro  
312 inhibitors would be predicted to prevent this cellular damage. Similarly, expression of 3CLpro is  
313 one of the earliest events in the viral life cycle, and may thus cause early cellular damage,  
314 potentially suppressing cellular defenses against the ensuing viral replication. Lingering effects  
315 of 3CLpro may also contribute to persistent symptoms, as observed with the long-COVID  
316 syndrome. In sum, the remarkable benefits of 3CLpro inhibition in COVID-19 patients  
317 underscores the need to further understand the impact of 3CLpro on the host proteome, which  
318 will be substantially aided by our predictive algorithm.

319

320 To validate our algorithm, we investigated the effects of 3CLPro in two different models (OE  
321 and live SARS-CoV-2) on hiPSC-CMs, previously shown to be susceptible to SARS-CoV-2  
322 infection with profound effects on sarcomeric organization<sup>34-36</sup>. We identified the giant  
323 sarcomeric protein Obscurin as a target of 3CLpro, and showed (1) that both ectopic expression

324 of 3CLpro and infection by SARS-CoV-2 cleave and degrade Obscurin, while leaving other  
325 sarcomeric proteins intact; and (2) that ectopic expression of 3CLpro, but not a mutant without  
326 enzymatic activity, causes sarcomeric disorganization in a stereotypical fashion similar to that  
327 observed with SARS-COV-2 infection, and consistent with the pattern predicted by degradation  
328 of Obscurin, an important structural component of the Z-disk. Thus, we propose that  
329 sarcomeric disorganization during SARS-CoV-2 infection is likely caused in large part by direct  
330 proteolysis of Obscurin by 3CLpro.

331  
332 Cardiac complications of COVID19 have been well documented, and the presence of cardiac  
333 damage, as reflected in plasma troponin levels, is highly predicted of morbidity and mortality  
334 after SARS-COV-2 infection<sup>45-47</sup>. It is still unclear if the pathology observed in the heart is due to  
335 a direct cytotoxic effect of the virus or secondary to the systemic inflammation. Some evidence  
336 of direct infection by SARS-CoV-2 in the human heart has been reported, suggesting that a  
337 direct effect is possible<sup>48,49</sup>, although other post-mortem studies have not detected infected  
338 cardiomyocytes in COVID-19 patients<sup>44-46</sup>. Thus, the implications of our findings in iPSCMs on  
339 human cardiac disease should be interpreted cautiously. We used these studies primarily as  
340 molecular and structural validation of our predictive algorithm. The use of hPSC-CMs also offers  
341 a powerful tool for pharmacological and drug screening, in addition to disease modeling.

342  
343 In summary, we provide a validated, computationally derived, comprehensive atlas of the  
344 putative 3CLpro degradome, overcoming limitations in sensitivity inherent to experimental  
345 approaches. Our findings provide a powerful tool to aid investigations into the virus-host

346 interactions mediated by 3CLpro, the target of highly efficacious therapy against COVID-19. In  
347 light of the structural conservation of the 3CL protease across coronavirus species, such  
348 investigations will likely also apply to future coronavirus outbreaks.

349

### 350 **Acknowledgements**

351 ZA was supported by NIH/NHLBI (HL152446). NY was supported by NIH training grant  
352 5T32AR053461. Q.M was supported by NIAMS T32 training grant (AR 53461-12). SM was  
353 supported by post-doctoral fellowship from the Institute for Stem Cells and Regenerative  
354 Medicine (University of Washington). This work was also supported by R01 HL128362 and R01  
355 HL146868 to C.E.M.; the Robert B. McMillen Foundation and the State of Washington  
356 philanthropical support to the UW Institute for Stem Cell and Regenerative Medicine. We  
357 would also like to acknowledge the staff of the University of Washington BSL-3 facility, as well  
358 as our Environmental Health and Safety staff, who provided assistance during experiments and  
359 ensured our safety.

360

361

### 362 **Conflicts of interest**

363 The authors declare no conflicts

364

365



## 366 Works Cited

367

- 368 1. Dong, E., Du, H. & Gardner, L. An interactive web-based dashboard to track COVID-19 in  
369 real time. *Lancet Infect. Dis.* **20**, 533–534 (2020).
- 370 2. Polak, S. B., Van Gool, I. C., Cohen, D., von der Thüsen, J. H. & van Paassen, J. A  
371 systematic review of pathological findings in COVID-19: a pathophysiological timeline and  
372 possible mechanisms of disease progression. *Mod. Pathol.* **33**, 2128–2138 (2020).
- 373 3. Guan, W. *et al.* Clinical Characteristics of Coronavirus Disease 2019 in China. *N. Engl. J.*  
374 *Med.* **382**, 1708–1720 (2020).
- 375 4. Wiersinga, W. J., Rhodes, A., Cheng, A. C., Peacock, S. J. & Prescott, H. C.  
376 Pathophysiology, Transmission, Diagnosis, and Treatment of Coronavirus Disease 2019  
377 (COVID-19): A Review. *JAMA* **324**, 782–793 (2020).
- 378 5. AlSamman, M., Caggiula, A., Ganguli, S., Misak, M. & Pourmand, A. Non-respiratory  
379 presentations of COVID-19, a clinical review. *Am. J. Emerg. Med.* **38**, 2444–2454 (2020).
- 380 6. Davis, H. E. *et al.* Characterizing long COVID in an international cohort: 7 months of  
381 symptoms and their impact. *EClinicalMedicine* **38**, 101019 (2021).
- 382 7. Nasserie, T., Hittle, M. & Goodman, S. N. Assessment of the Frequency and Variety of  
383 Persistent Symptoms Among Patients With COVID-19: A Systematic Review. *JAMA Netw.*  
384 *Open* **4**, e2111417–e2111417 (2021).
- 385 8. Gordon, D. E. *et al.* A SARS-CoV-2 protein interaction map reveals targets for drug  
386 repurposing. *Nature* **583**, 459–468 (2020).
- 387 9. Wang, R. *et al.* Genetic Screens Identify Host Factors for SARS-CoV-2 and Common Cold  
388 Coronaviruses. *Cell* **184**, 106–119.e14 (2021).
- 389 10. Schneider, W. M. *et al.* Genome-Scale Identification of SARS-CoV-2 and Pan-coronavirus  
390 Host Factor Networks. *Cell* **184**, 120–132.e14 (2021).
- 391 11. Badorff, C. *et al.* Enteroviral protease 2A cleaves dystrophin: evidence of cytoskeletal  
392 disruption in an acquired cardiomyopathy. *Nat. Med.* **5**, 320–326 (1999).
- 393 12. Lim, B.-K. *et al.* Inhibition of Coxsackievirus-associated dystrophin cleavage prevents  
394 cardiomyopathy. *J. Clin. Invest.* **123**, 5146–5151 (2013).
- 395 13. Robinson, K. S. *et al.* Enteroviral 3C protease activates the human NLRP1 inflammasome  
396 in airway epithelia. *Science* **370**, (2020).
- 397 14. Nie, Z. *et al.* Human immunodeficiency virus type 1 protease cleaves procaspase 8 in  
398 vivo. *J. Virol.* **81**, 6947–6956 (2007).
- 399 15. Strack, P. R. *et al.* Apoptosis mediated by HIV protease is preceded by cleavage of Bcl-2.  
400 *Proc. Natl. Acad. Sci. U. S. A.* **93**, 9571–9576 (1996).
- 401 16. Morazzani, E. M. *et al.* Proteolytic cleavage of host proteins by the Group IV viral  
402 proteases of Venezuelan equine encephalitis virus and Zika virus. *Antiviral Res.* **164**, 106–  
403 122 (2019).
- 404 17. Hegyi, A. & Ziebuhr, J. Conservation of substrate specificities among coronavirus main  
405 proteases. *J. Gen. Virol.* **83**, 595–599 (2002).
- 406 18. MacDonald, E. A. *et al.* Recognition of Divergent Viral Substrates by the SARS-CoV-2 Main  
407 Protease. *ACS Infect. Dis.* **7**, 2591–2595 (2021).
- 408 19. Shitrit, A. *et al.* Conserved interactions required for inhibition of the main protease of  
409 severe acute respiratory syndrome coronavirus 2 (SARS-CoV-2). *Sci. Rep.* **10**, 20808

- 410 (2020).
- 411 20. V'kovski, P., Kratzel, A., Steiner, S., Stalder, H. & Thiel, V. Coronavirus biology and  
412 replication: implications for SARS-CoV-2. *Nat. Rev. Microbiol.* (2020).  
413 doi:10.1038/s41579-020-00468-6
- 414 21. Osipiuk, J. *et al.* Structure of papain-like protease from SARS-CoV-2 and its complexes  
415 with non-covalent inhibitors. *Nat. Commun.* **12**, 743 (2021).
- 416 22. Boras, B. *et al.* Preclinical characterization of an intravenous coronavirus 3CL protease  
417 inhibitor for the potential treatment of COVID19. *Nat. Commun.* **12**, 6055 (2021).
- 418 23. Zhang, S., Wang, J. & Cheng, G. Protease cleavage of RNF20 facilitates coronavirus  
419 replication via stabilization of SREBP1. *Proc Natl Acad Sci USA* **118**, e2107108118 (2021).
- 420 24. Moustaqil, M. *et al.* SARS-CoV-2 proteases PLpro and 3CLpro cleave IRF3 and critical  
421 modulators of inflammatory pathways (NLRP12 and TAB1): implications for disease  
422 presentation across species. *Emerg. Microbes Infect.* **10**, 178–195 (2021).
- 423 25. Meyer, B. *et al.* Characterising proteolysis during SARS-CoV-2 infection identifies viral  
424 cleavage sites and cellular targets with therapeutic potential. *Nat. Commun.* **12**, 5553  
425 (2021).
- 426 26. Pablos, I. *et al.* Mechanistic insights into COVID-19 by global analysis of the SARS-CoV-2  
427 3CL<sup>pro</sup> substrate degradome. *Cell Rep.* **37**, (2021).
- 428 27. Kaushal, P. & Lee, C. N-terminomics – its past and recent advancements. *J. Proteomics*  
429 **233**, 104089 (2021).
- 430 28. Angel, T. E. *et al.* Mass spectrometry-based proteomics: existing capabilities and future  
431 directions. *Chem. Soc. Rev.* **41**, 3912–3928 (2012).
- 432 29. Valerdi, K. M., Hage, A., van Tol, S., Rajsbaum, R. & Giraldo, M. I. The Role of the Host  
433 Ubiquitin System in Promoting Replication of Emergent Viruses. *Viruses* **13**, (2021).
- 434 30. Tran, K., Mahr, J. A. & Spector, D. H. Proteasome subunits relocalize during human  
435 cytomegalovirus infection, and proteasome activity is necessary for efficient viral gene  
436 transcription. *J. Virol.* **84**, 3079–3093 (2010).
- 437 31. Kiemer, L., Lund, O., Brunak, S. & Blom, N. Coronavirus 3CLpro proteinase cleavage sites:  
438 possible relevance to SARS virus pathology. *BMC Bioinformatics* **5**, 72 (2004).
- 439 32. Chuck, C.-P. *et al.* Profiling of Substrate Specificity of SARS-CoV 3CLpro. *PLoS One* **5**,  
440 e13197 (2010).
- 441 33. Zhang, L. *et al.* Crystal structure of SARS-CoV-2 main protease provides a basis for design  
442 of improved  $\alpha$ -ketoamide inhibitors. *Science* **368**, 409–412 (2020).
- 443 34. Perez-Bermejo, J. A. *et al.* SARS-CoV-2 infection of human iPSC-derived cardiac cells  
444 reflects cytopathic features in hearts of patients with COVID-19. *Sci. Transl. Med.* **13**,  
445 (2021).
- 446 35. Marchiano, S. *et al.* SARS-CoV-2 Infects Human Pluripotent Stem Cell-Derived  
447 Cardiomyocytes, Impairing Electrical and Mechanical Function. *Stem cell reports* **16**,  
448 478–492 (2021).
- 449 36. Li, Y. *et al.* SARS-CoV-2 induces double-stranded RNA-mediated innate immune  
450 responses in respiratory epithelial-derived cells and cardiomyocytes. *Proc. Natl. Acad.*  
451 *Sci.* **118**, e2022643118 (2021).
- 452 37. Roe, M. K., Junod, N. A., Young, A. R., Beachboard, D. C. & Stobart, C. C. Targeting novel  
453 structural and functional features of coronavirus protease nsp5 (3CLpro, Mpro) in the

- 454 age of COVID-19. *J. Gen. Virol.* **102**, (2021).
- 455 38. Grum-Tokars, V., Ratia, K., Begaye, A., Baker, S. C. & Mesecar, A. D. Evaluating the 3C-like  
456 protease activity of SARS-Coronavirus: recommendations for standardized assays for  
457 drug discovery. *Virus Res.* **133**, 63–73 (2008).
- 458 39. Drozdetskiy, A., Cole, C., Procter, J. & Barton, G. J. JPred4: a protein secondary structure  
459 prediction server. *Nucleic Acids Res.* **43**, W389-94 (2015).
- 460 40. Li, F. *et al.* Procleave: Predicting Protease-specific Substrate Cleavage Sites by Combining  
461 Sequence and Structural Information. *Genomics. Proteomics Bioinformatics* **18**, 52–64  
462 (2020).
- 463 41. Timmer, J. C. *et al.* Structural and kinetic determinants of protease substrates. *Nat.*  
464 *Struct. Mol. Biol.* **16**, 1101–1108 (2009).
- 465 42. Jumper, J. *et al.* Highly accurate protein structure prediction with AlphaFold. *Nature* **596**,  
466 583–589 (2021).
- 467 43. Chou, P. Y. & Fasman, G. D. Conformational parameters for amino acids in helical,  $\beta$ -  
468 sheet, and random coil regions calculated from proteins. *Biochemistry* **13**, 211–222  
469 (1974).
- 470 44. Bailey, A. L. *et al.* SARS-CoV-2 Infects Human Engineered Heart Tissues and Models  
471 COVID-19 Myocarditis. *JACC. Basic to Transl. Sci.* **6**, 331–345 (2021).
- 472 45. Majure, D. T. *et al.* Usefulness of Elevated Troponin to Predict Death in Patients With  
473 COVID-19 and Myocardial Injury. *Am. J. Cardiol.* **138**, 100–106 (2021).
- 474 46. García de Guadiana-Romualdo, L. *et al.* Cardiac troponin and COVID-19 severity: Results  
475 from BIOCOVID study. *Eur. J. Clin. Invest.* **51**, e13532 (2021).
- 476 47. Lombardi, C. M. *et al.* Association of Troponin Levels With Mortality in Italian Patients  
477 Hospitalized With Coronavirus Disease 2019: Results of a Multicenter Study. *JAMA*  
478 *Cardiol.* **5**, 1274–1280 (2020).
- 479 48. Pesaresi, M. *et al.* SARS-CoV-2 identification in lungs, heart and kidney specimens by  
480 transmission and scanning electron microscopy. *Eur. Rev. Med. Pharmacol. Sci.* **24**,  
481 5186–5188 (2020).
- 482 49. Clemens, D. J. *et al.* B-AB18-03 SARS-COV-2 DIRECT CARDIAC DAMAGE THROUGH SPIKE-  
483 MEDIATED CARDIOMYOCYTE FUSION MAY CONTRIBUTE TO INCREASED ARRHYTHMIC  
484 RISK IN COVID-19. *Hear. Rhythm* **18**, S35–S35 (2021).
- 485

**Fig 1. Bioinformatic prediction of SARS-CoV-2 3CLPro human protein targets**

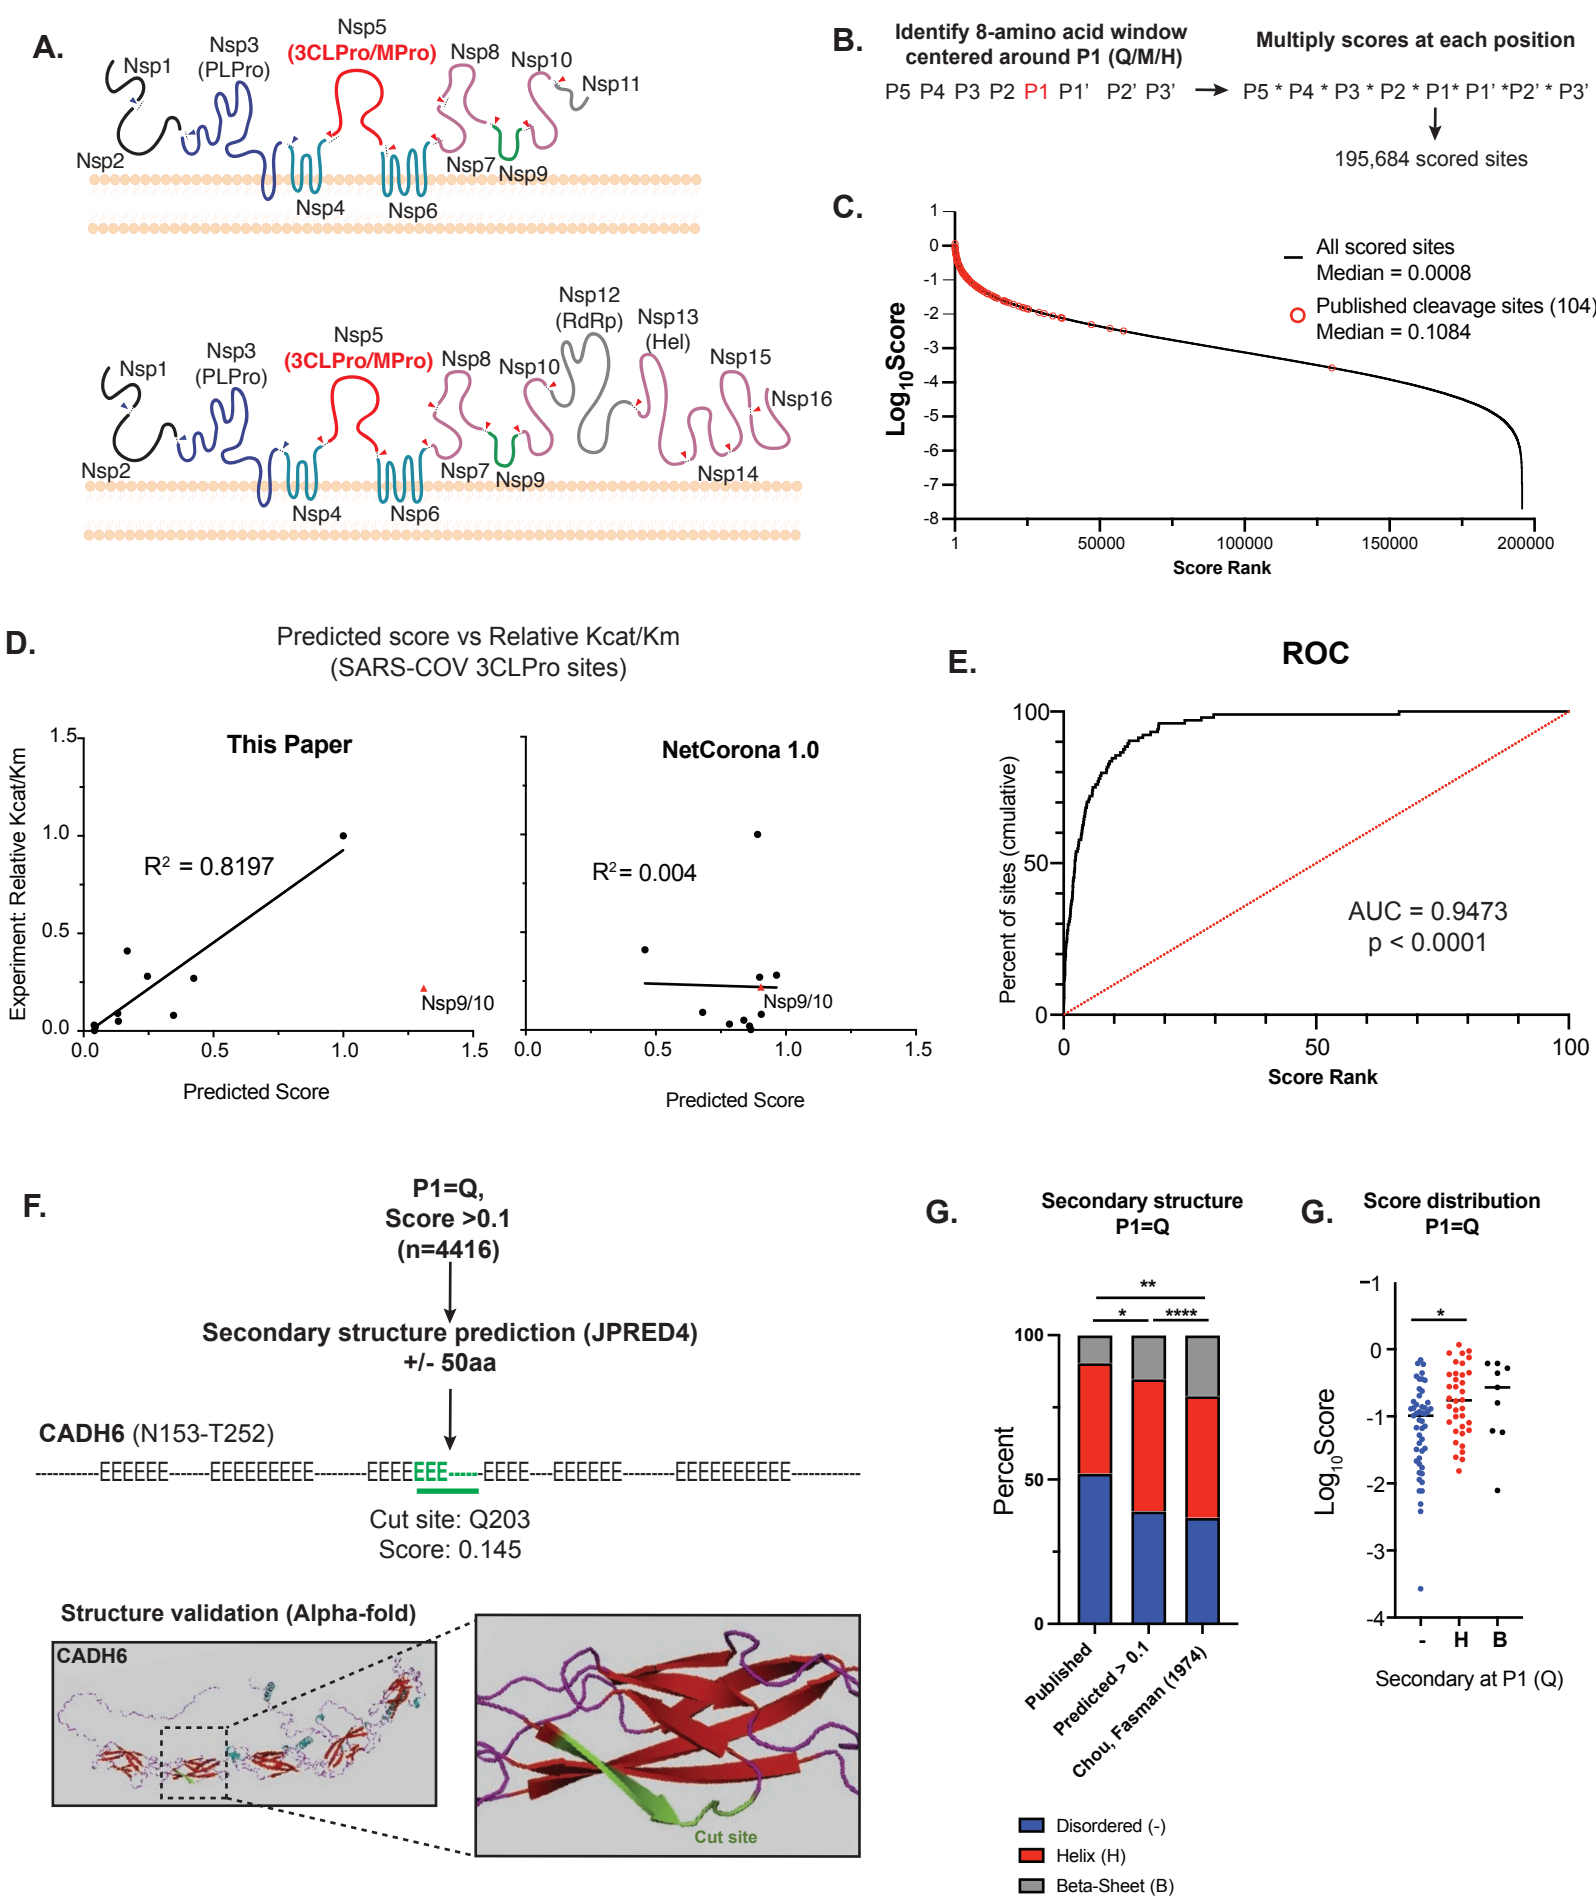

486 Figure 1

- 487 A) Diagram of endogenous function of the SARS-CoV-2 3C-like protease (3CLPro). 3CLPro  
488 cleaves at 11 sites within the 2 large polypeptides pp1a and pp1ab generated from the  
489 overlapping reading frames ORF1a and ORF1ab (respectively). Cleavage by 3CLPro, as  
490 well as the other viral protease papain-like protease (PLPro) liberates the nonstructural  
491 proteins (NSPs) that are required for viral transcription, replication, suppression of host  
492 immune responses and suppression of host gene expression.
- 493 B) Work-flow for bioinformatic identification and scoring of putative 3CLPro cleavage sites  
494 within the human proteome. Scores for each position along the cleavage site (P5-P3')  
495 were obtained from experimental data from SARS-CoV 3CLPro (**Chuck, et al 2010**). First  
496 P1 positions were identified (Q, M or H), and overall cleavage score generated by  
497 multiplying scores for each amino acid around P1. Within each 8-amino acid window,  
498 any position that contained an amino acid that scored a "ND" (no cleavage detected) in  
499 **Chuck, et al** resulted in a score of 0. Overall, 195,684 scored cleavage sites (>0) were  
500 detected across the human proteome.
- 501 C) Distribution of all scores ( $\text{Log}_{10}\text{Score}$ ). Scores of published cleavage sites detected by our  
502 prediction are highlighted in red.
- 503 D) Correlation of predicted score with experimentally-derived  $K_{\text{cat}}/K_m$  values for SARS-COV  
504 3CLPro (**Grums-Tokars, 2008**). Scores generated in this study are shown on the left, and  
505 scores generated by NetCorona1.0 (**Kiemer, 2004**). Shown on the right. For  $R^2$   
506 calculations, the cleavage site between NSP9 and NSP10 for both graphs.
- 507 E) Receiver operator curve analysis to assess predictive power of bioinformatic scoring  
508 based on scores of published cleavage sites. Cumulative percentage of scores captured  
509 plotted vs score rank (highest score = 1 to lowest score = 100), and area under the curve  
510 (AUC) captured. 95% confidence interval determined by Wilson/Brown method.
- 511 F) Secondary structure analysis of high scoring sites (>0.1) with P1 = Q. To increase  
512 secondary structure accuracy, a 100aa window centered around P1 (Q) was identified.  
513 Resulting 100aa peptides were analysed by JPRED4 to predict secondary structure ("-" =  
514 unstructured, "H" = alpha-helix, "E" = beta-sheet). When available, candidate cleavage  
515 sites were verified by alpha-Fold structure. Highlighted is a predicted site in Cadherin-6  
516 (CADH6).
- 517 G) Fraction of each P1 (Q) that lies in each type of secondary structure (unstructured,  
518 alpha-helix, beta sheet). Comparisons shown for predicted cleavage sites with score >  
519 0.1 vs published cleavage sites (all scores) vs published secondary structure distribution  
520 of all glutamines (Q). Statistical analysis of secondary structure distribution calculated  
521 using Chi-squared goodness of fit.
- 522 H) Score distribution of published cleavage sites (P1=Q), striated by secondary structure.  
523 Statistical analysis calculated by one-way ANOVA with Holm-Sidak multiple comparison  
524 test.

525

526 For all statistics shown, \* =  $p \leq 0.05$ , \*\*  $p \leq 0.01$ , \*\*\*  $p \leq 0.001$ , \*\*\*\* =  $p \leq 0.00001$

**Fig 2.**

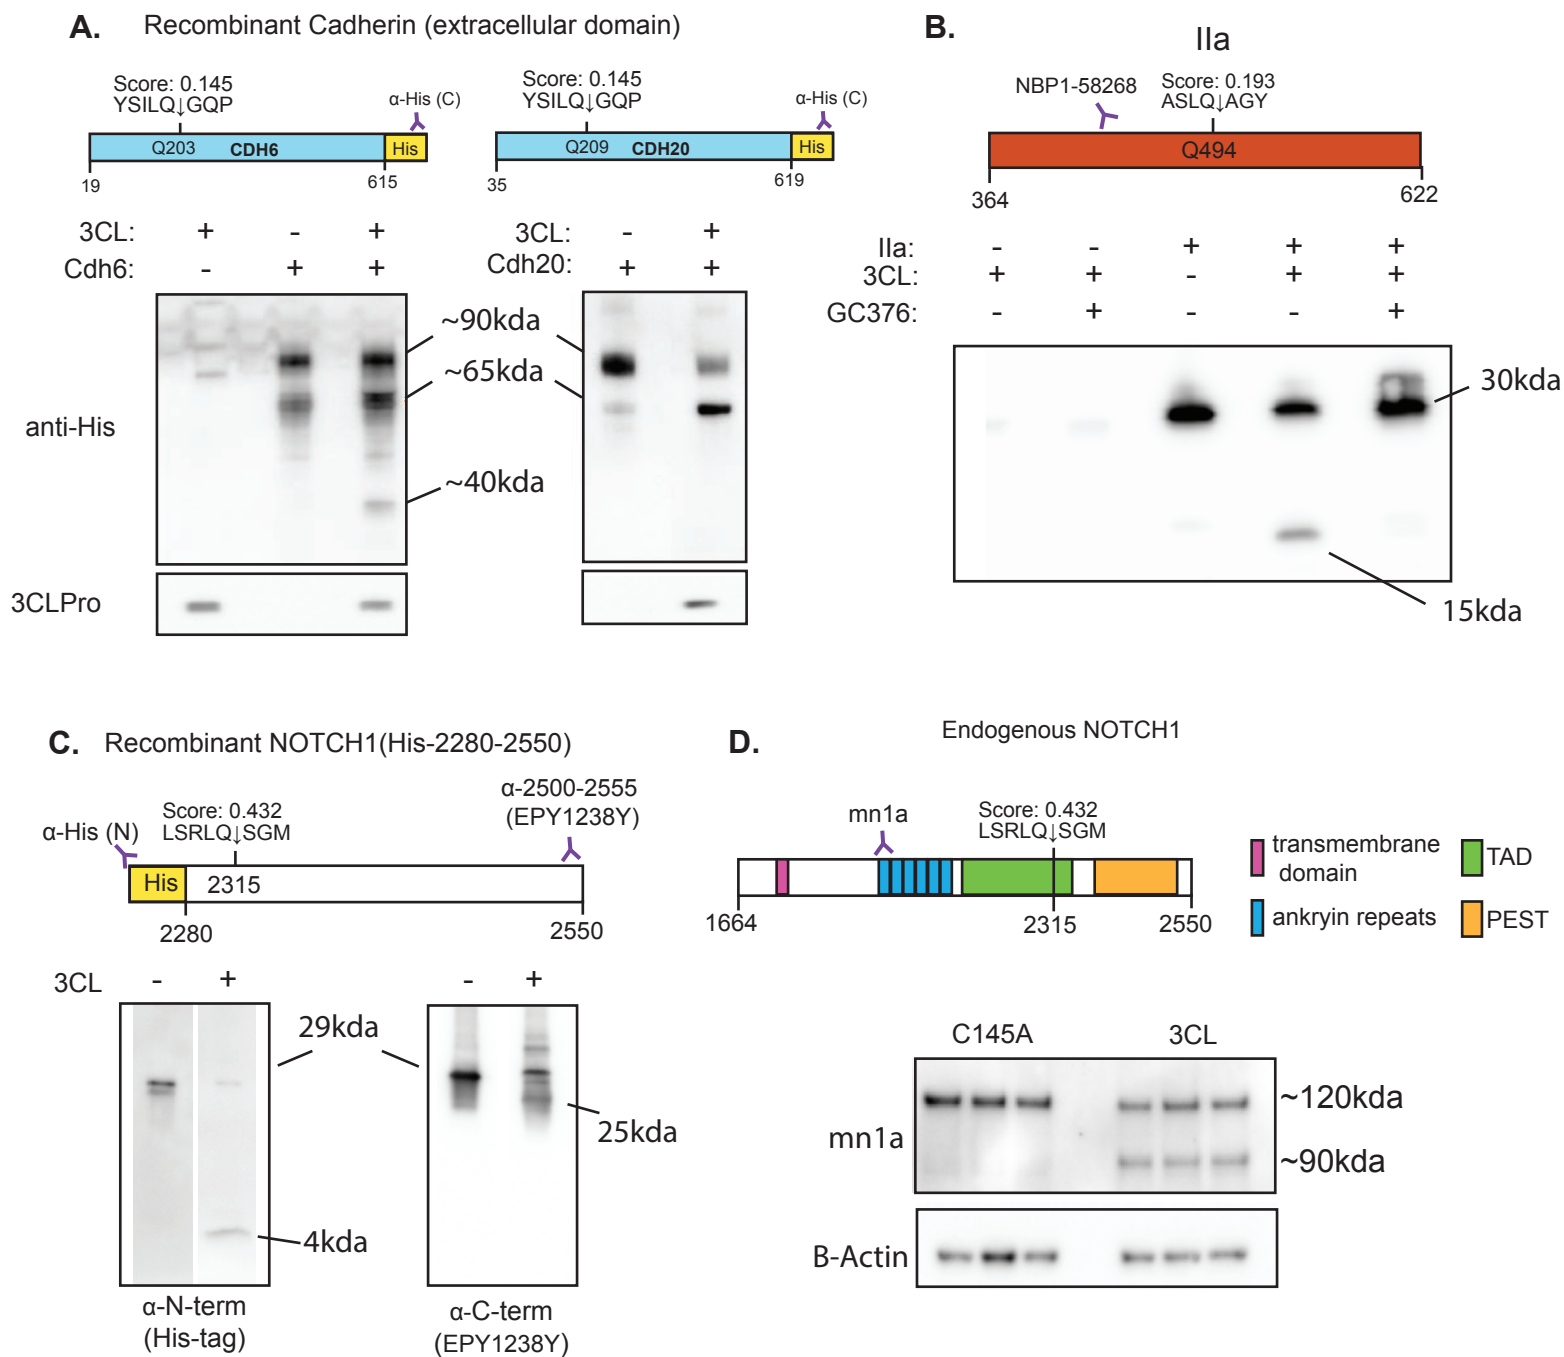

527 Figure 2

- 528 A) Western blot of *in vitro* cleavage of recombinant cadherin with purified 3CLPro. 1uM of  
529 purified 3CLPro was incubated with 2ug of recombinant CDH6 or CDH20 (C-terminal His-  
530 Tag) in a 50uL reaction for 1hr. Shown are cleavage sites within the recombinant fragment,  
531 with amino acid positions displayed for the full length proteins. Western blots showing  
532 staining against the C-terminus (His-Tag) of each protein and 3CLPro. Recombinant proteins  
533 are a mixture of glycosylated (~90kDa) and unglycosylated (~65kda), corresponding to  
534 cleavage fragments of ~62kDa and 40kDa (respectively).
- 535 B) Western blot of *in vitro* cleavage of purified human alpha thrombin (IIa). Diagram shows  
536 amino acid position of unprocessed prothrombin. Position of cleavage site shown with  
537 respect to epitope of antibody used for western blot. 1uM of purified 3CLpro was  
538 incubated with 2ug alpha thrombin overnight under reducing conditions, with or without  
539 the 3CLPro inhibitor GC376 (1uM).
- 540 C) *In vitro* cleavage of purified recombinant NOTCH1 fragment (aa2280-2550) with a N-  
541 terminal His-Tag. Reactions were done with 1uM of purified 3CLPro for 1hr. Diagram shows  
542 position of cleavage within the NOTCH1 fragment, with amino acid positions corresponding  
543 to the full length protein. Epitope regions showed for antibody with epitope C-terminal to  
544 the cleavage site. Full length size is ~29kDa, with N and C-terminal fragments of 4kDa and  
545 25kDa (respectively).
- 546 D) Cellular cleavage of NOTCH1. Western blots show lysates of hiPSC cardiomyocytes  
547 expressing 3CLPro or catalytically inactive C145A variant for 48h. Cleavage site position  
548 within the intracellular fragment of NOTCH1 shown, as well as epitope for antibody used in  
549 western blot.

550

551 For all statistics shown, \* =  $p \leq 0.05$  , \*\*  $p \leq 0.01$ , \*\*\* $p \leq 0.001$ , \*\*\*\* =  $p \leq 0.00001$

**Fig 3**

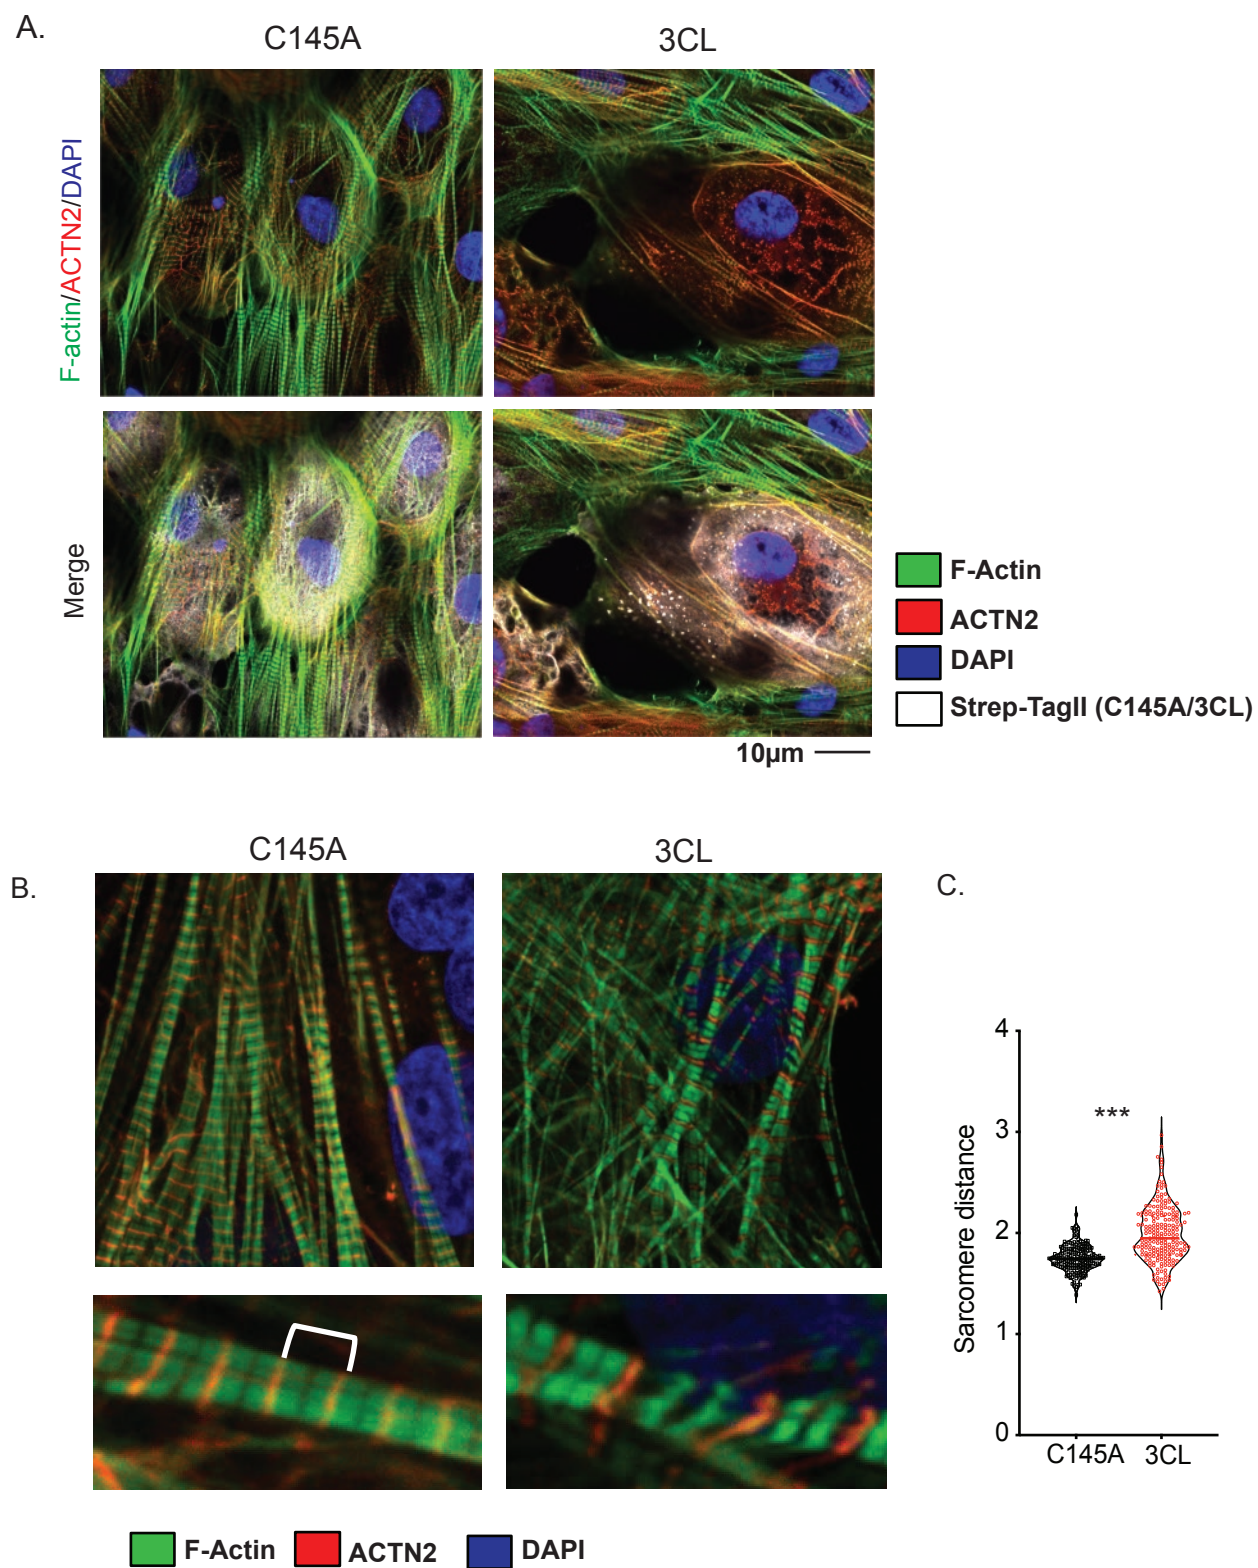



552 Figure 3

553 A) Sarcomere breakdown with overexpression of 3CLPro. hiPSC-CMs transduced with  
554 adenovirus overexpressing Strep-Tagged 3CLPro or catalytically inactive C145A control  
555 for 48h. Staining shows alpha-actinin (ACTN2), F-actin (phalloidin) and Strep-Tag. DAPI  
556 counterstain.

557 B) Increased sarcomere length with overexpression of 3CLPro. Sarcomeres are stained  
558 with ACTN2 to mark Z-disks. Example image of sarcomeres with increased distance.

559 C) Quantification of sarcomere distance. Sarcomere lengths (Z-disk to Z-disk length, as  
560 stained by ACTN2) were quantified for ~200 sarcomeres (N=2/3 independent  
561 experiments? or only 1 exp with 200 sarcomeres?). Statistics shown by Student's t-test  
562 (\*\*\*) p = XXX).

563

564 For all statistics shown, \* =  $p \leq 0.05$  , \*\*  $p \leq 0.01$ , \*\*\*  $p \leq 0.001$ , \*\*\*\* =  $p \leq 0.00001$

## Fig 4

### A. Obscurin cleavage sites

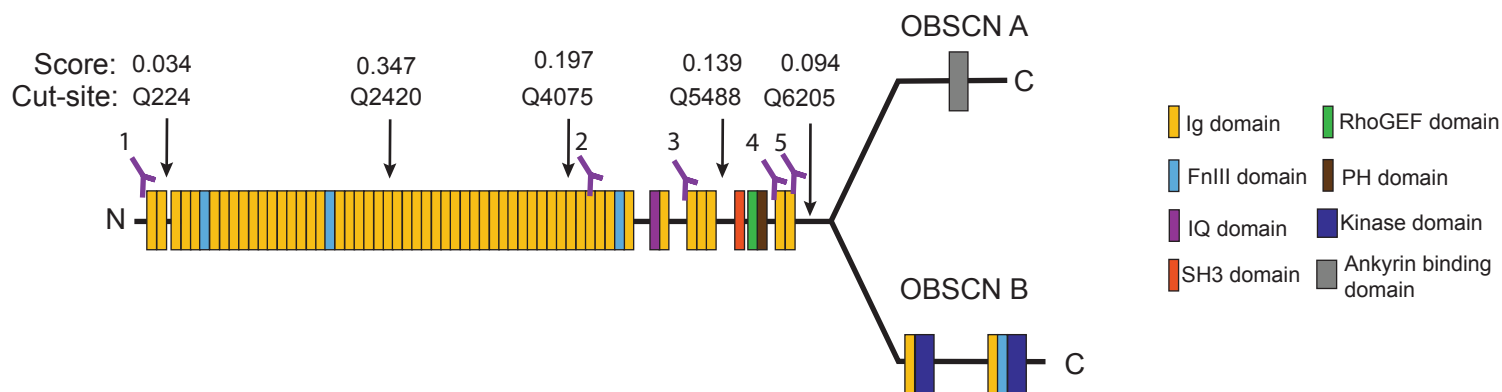

### B.

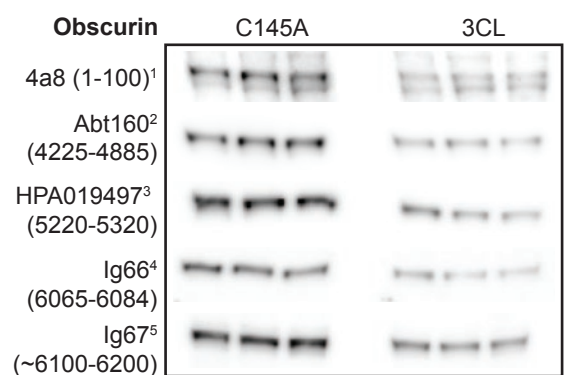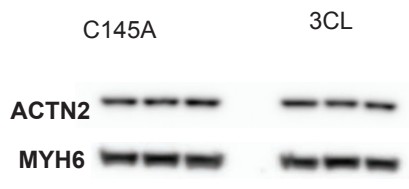

### C.

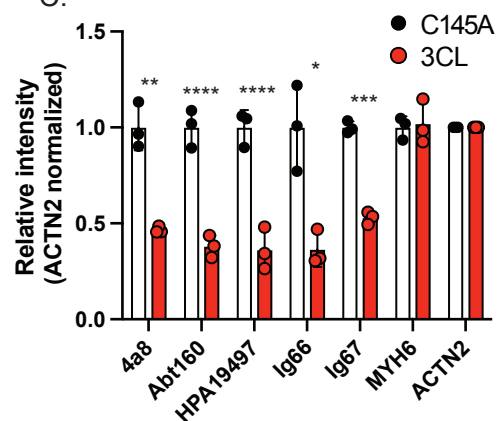

### D. Obscurin imaging

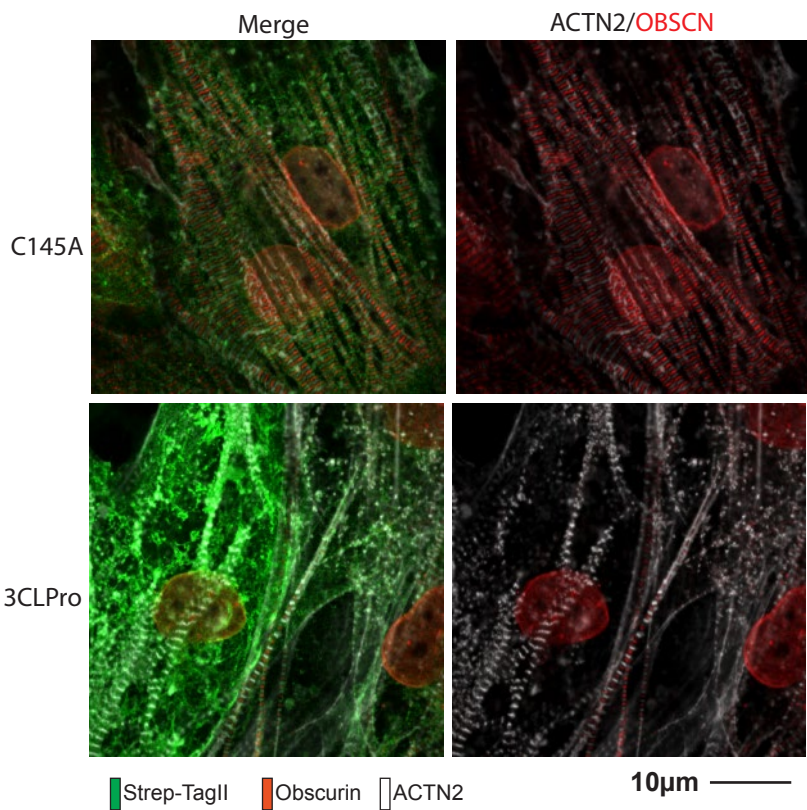

### E.

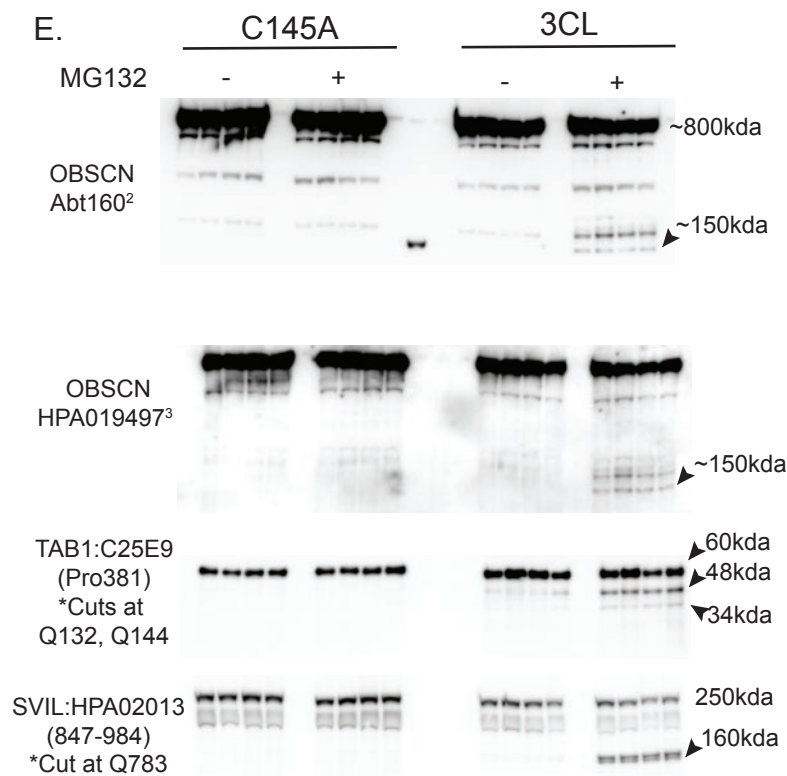

565  
566  
567  
568  
569  
570  
571  
572  
573  
574  
575  
576  
577  
578  
579

Figure 4

- A) Schematic of Obscurin (OBSCN) with overlaid predicted cleavage sites and protein domain. Epitopes regions for antibodies used for this study shown (1-5).
- B) Obscurin expression after 72h of 3CLPro or catalytically inactive C145A. Western blots shown for all 5 OBSCN antibodies, as well as ACTN2 and MYH6 controls.
- C) Quantification of blots shown in **B**, normalized by ACTN2 staining on the same membrane. Statistics by Student's t-test.
- D) Immunocytochemistry for OBSCN2 and ACTN2 after 48h overexpression of 3CLPro or catalytically inactive C145A.
- E) Expression of cleavage targets following expression of 3CLpro or catalytically active C145A. Following 24h of overexpression, MG132 (1uM) or vehicle was added for 24h for a total of 48h overexpression with or without MG132. Fragments are highlighted for OBSCN, TAB1, and SVIL.

580 For all statistics shown, \* =  $p \leq 0.05$  , \*\*  $p \leq 0.01$ , \*\*\* $p \leq 0.001$ , \*\*\*\* =  $p \leq 0.00001$

## Fig 5. Obscurin degradation in SAR-COV2 infection

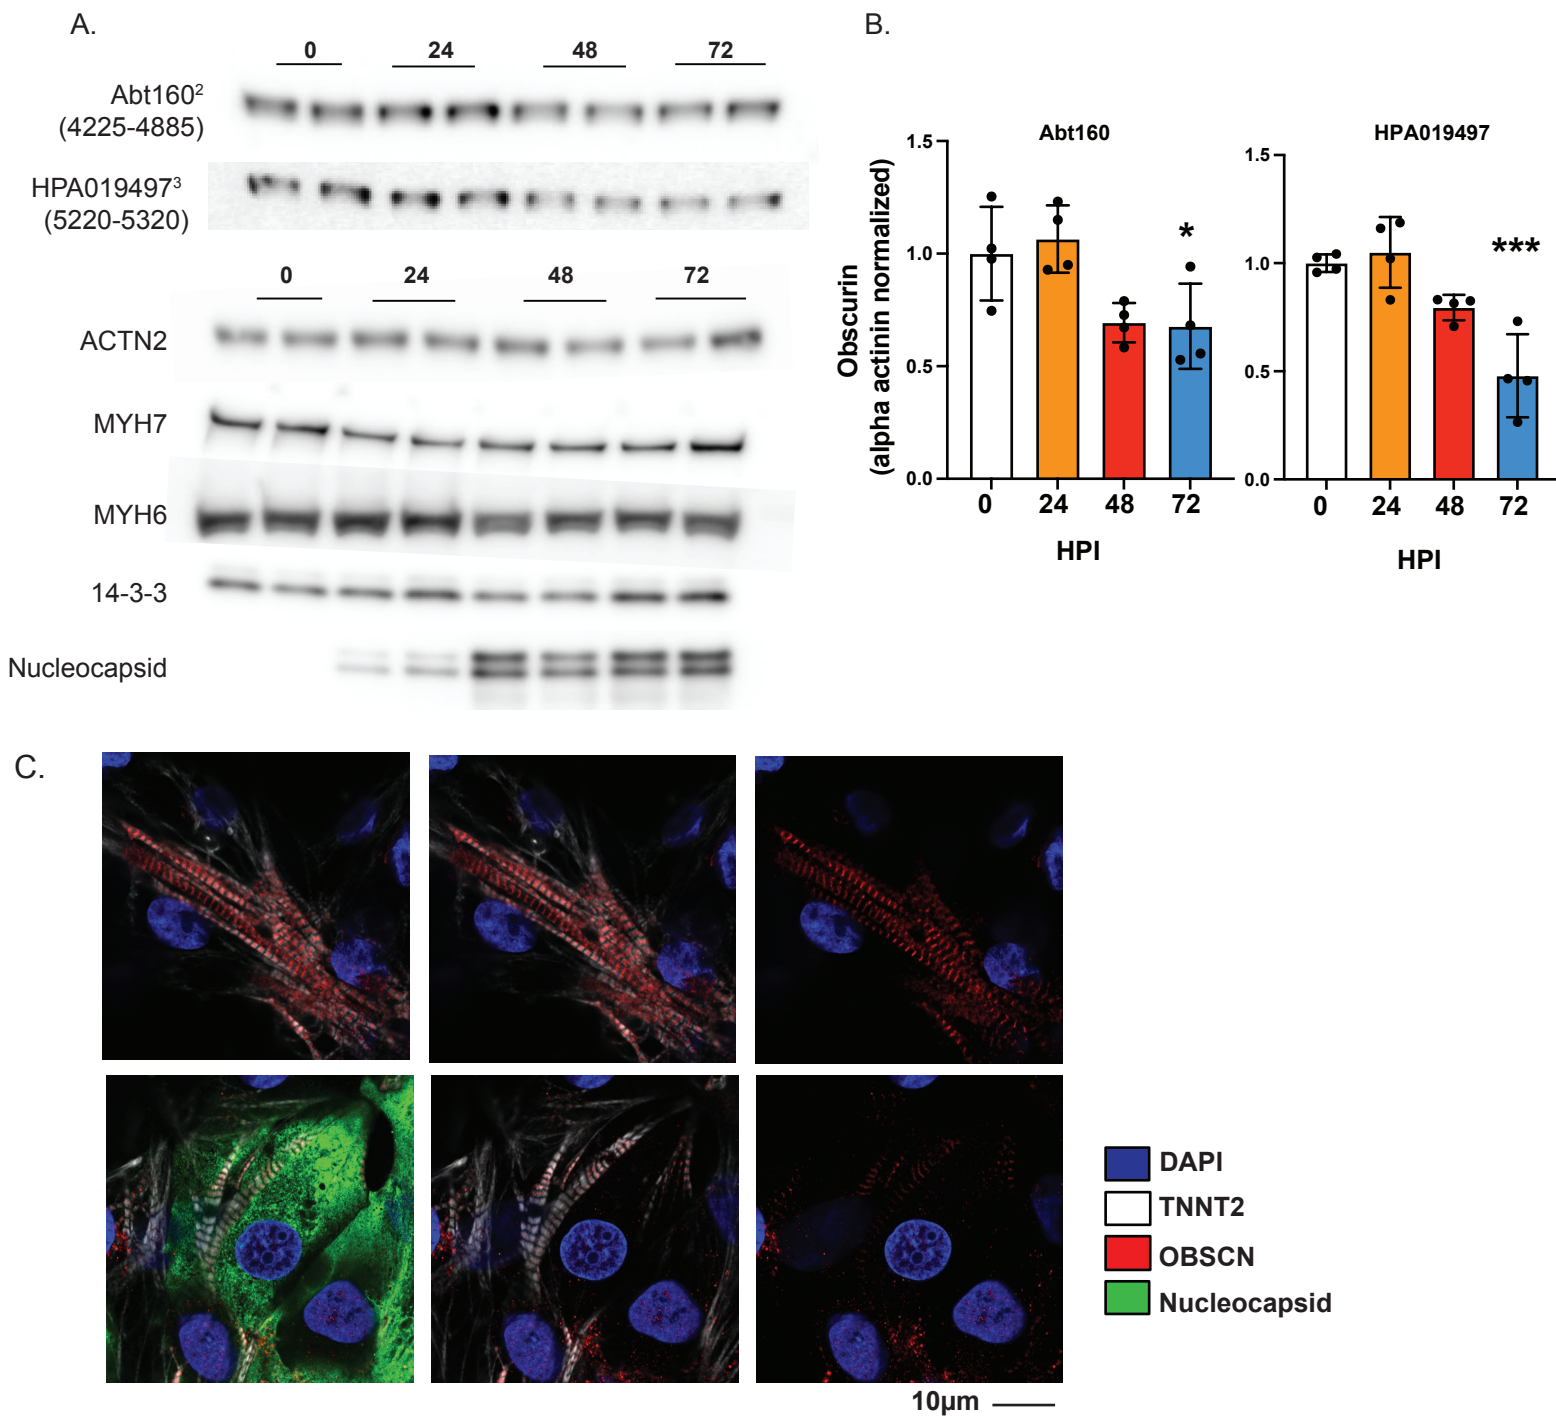

581 Figure 5

- 582 A) Western blots of WTC-11c hPSC-CMs infected with SARS-CoV-2 at 5 MOI (Multiplicity of  
583 infection) after 24, 48 and 72h.
- 584 B) Quantification of OSCN staining normalized for ACTN2 (per blot). Shown are n=2 for  
585 each time point for 2 different hPSC-CMs cell lines (WTC-11c and H7) for a total of n=4.  
586 Statistics calculated by one-way ANOVA with Tukey's post-hoc test.
- 587 C) Immunocytochemistry for OBSCN in WTC-11c hPSC-CMs at 48 HPI with 5 MOI SARS-  
588 CoV-2. TNNT2 used as a counterstain for sarcomeres, and nucleocapsid staining  
589 performed to identify infected cells.

590

591 For all statistics shown, \* =  $p \leq 0.05$  , \*\*  $p \leq 0.01$ , \*\*\* $p \leq 0.001$ , \*\*\*\* =  $p \leq 0.00001$

## Supplemental Figure 1

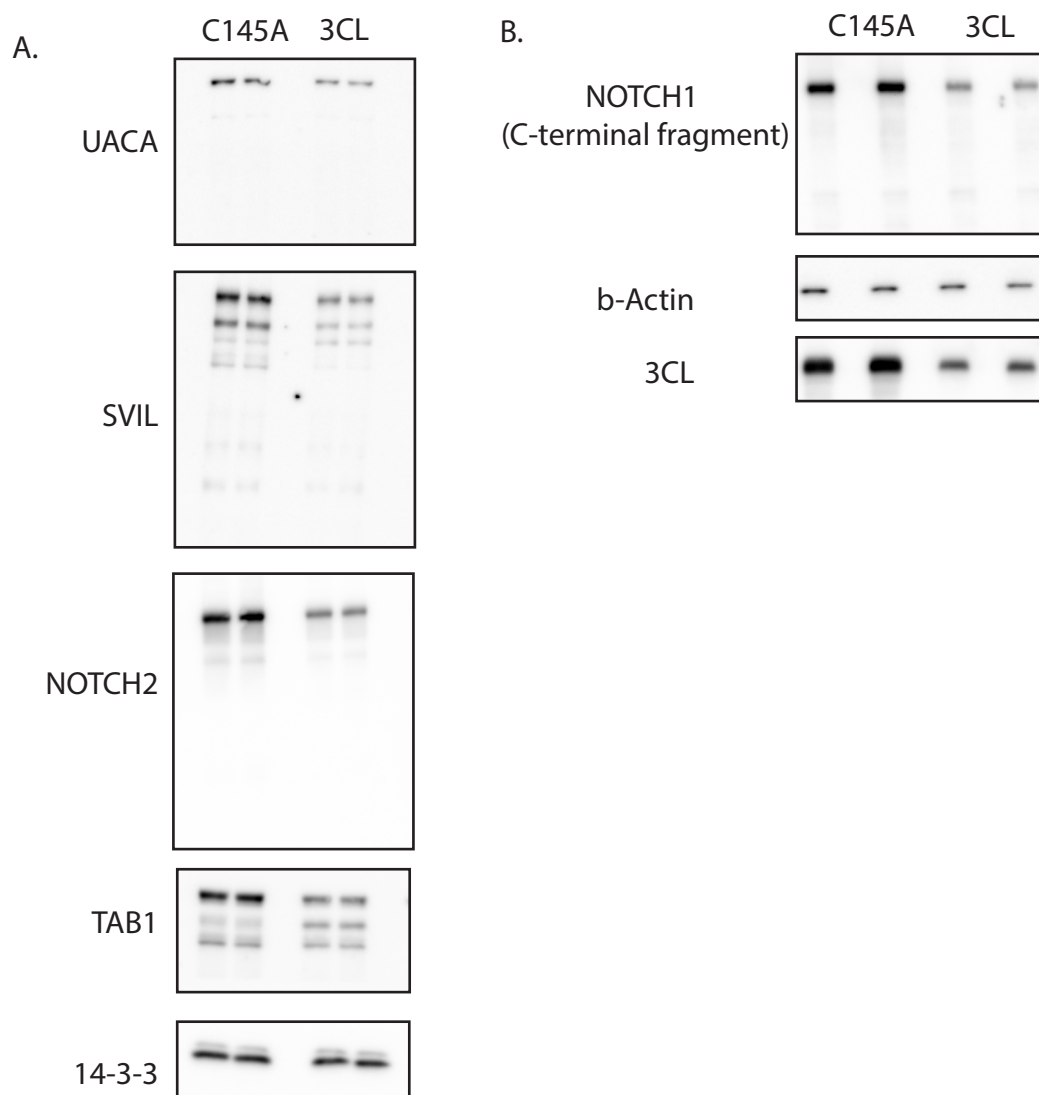

592           Supplementary Figure 1

593

594           A) Western blots of candidate cleavage targets. 48h overexpression of 3CLPro or C145A in  
595           293T cells.

596           B) Western blot for the C-terminal cleavage fragment of NOTCH1 following 48h  
597           overexpression in 293T cells.

## **Methods**

### **Bioinformatic prediction of 3CLpro cleavage sites**

In brief, P1 positions (Q, M or H) were first identified across the human proteome. 8 amino acid peptides were generated centered at this position, corresponding to P5 – P3' positions in the 3CLPro consensus sequence. Scores were generated by multiplying the relative efficiency values published by Chuck, et al for the SARS-COV (2003) 3CLPro. All sites with a score > 0 (i.e., those that did not have an “ND” in any of the positions from P5- P3') were captured. The full code for this program will be shared upon publication.

### **In vitro cleavage assays**

In vitro cleavage assays were performed with purified 3CLPro protein and assay buffer from BPS Bioscience. Protease was added at 1uM concentration, and recombinant protein targets at an approximate ratio of 2ug target/1ug 3CLPro. Recombinant proteins were purchased commercially: NOTCH1 (Origene, Cat# TP762041), CDH6 (ACROBiosystem, Cat# CA6-H5229), CDH20 (R&D, Cat# 5604-CA-050). Purified human alpha-thrombin was purchased from Haematologic Technologies (Cat# 50-883-435).

### **Cell Culture**

For 3CLPro overexpression assays, human induced pluripotent (hiPSC) ventricular cardiomyocytes were purchased from NCardia. Cells were plated at ~150,000 cells/24-well on fibronectin coated (Sigma, F1131), glass bottomed nano-patterned plates or coverslips (CuriBio, ANFS-0024). Following 4 days of maturation, cells were transduced with adenovirus (Vector Biolabs) to induce expression of 3CLPro or catalytically inactive C145A, and lysates collected at 48 or 72h in TU buffer.

### **Human induced-pluripotent stem cells culture and differentiation**

Human induced-pluripotent stem cells (WTC11c hiPSCs, gifted by Dr. Bruce Conklin, Gladstone Institutes, San Francisco) were maintained in complete mTeSR Plus (Stem Cell Technologies) and cultured on Matrigel-coated dishes at 0.17mg/mL (Corning). WTC hiPSCc were passaged as small clumps for maintenance or single cell-like suspension for cardiac differentiation using Versene (Gibco) and mTeSR Plus supplemented with 10 µM Y-27632 (Tocris). Cardiac differentiation was performed as previously described (PMID: 33657418). Briefly, WTC hiPSCs were seeded at 1,000 cells/cm<sup>2</sup> using mTeSR1 Plus and 10 µM Y-27632 on Matrigel-coated dishes. After 24 h, media was replaced with mTeSR Plus supplemented with 1 µM Chiron 99021 (Cayman) to prime the cells for differentiation. Mesoderm induction (Day 0) was performed with 3 µM Chiron 99021 in RPMI-1640 media (ThermoFisher) supplemented with 500 µg/mL BSA (Sigma-Aldrich) and 213 µg/mL ascorbic acid (Sigma-Aldrich), named RBA media. After 48 h (Day 2), cells were treated with RBA media supplemented with 2 µM WNT-C59 (Selleckchem). On day 4, media was change with RBA only and cells were incubated for an additional 48 h. From day 6 until day 13, hiPSC-derived cardiomyocytes (hiPSC-CMs) were maintained in RPMI-1640 supplemented with B-27 supplement (ThermoFisher). Heat-shock was performed at 42C for 30 min and on day 14, hiPSC-CMs were dissociated using 0.5% Trypsin (Gibco) and cryopreserved in Cryostore CS10 (Sigma).



### **hiPSC-CMs infection**

All experiments using live virus were performed in the Biosafety Level 3 (BSL-3) facility at the University of Washington in compliance with the BSL-3 laboratory safety protocols (CDC BMBL 5th ed.) and the recent CDC guidelines for handling SARS-CoV-2. Before removing samples from BSL-3 containment, samples were inactivated by Thiourea buffer or 4% paraformaldehyde, and the absence of viable SARS-CoV-2 was confirmed for each sample by plaque assays described in the next section.

Frozen hiPSC-CMs were thawed in RPMI 1640 supplemented with B27 supplements, 10  $\mu$ M Y-27632 and 5% FBS. After 24 h, media was replaced with RPMI 1640 supplemented with B27 supplements only. A total of 200,000 hiPSC-CMs were seeded three days after thawing in Matrigel-coated 24-wells plate using RPMI 1640 supplemented with B27 supplements, 10  $\mu$ M Y-27632 and 5% FBS. Media was changed after 24 h and infection was performed as previously described (PMID: 33657418). Briefly, hiPSC-CMs were quickly washed with DPBS and incubated with SARS-CoV-2 at 5 multiplicity of infection (MOI) diluted in DMEM only (Gibco) for 1 h at 37 C. Mock-control hiPSC-CMs were treated with DMEM only. Media was then replaced with RPMI 1640 supplemented with B27 supplements and samples were collected at 48 h after infection. For MG132 treated samples, after viral absorption, media was replaced with RPMI 1640 supplemented with B27 supplements and 1  $\mu$ M of MG132 (DMSO was used for control).

### **SARS-CoV-2 preparation and titer.**

SARS-Related Coronavirus 2, Isolate USA-WA1/2020 (SARS-CoV-2) was obtained from BEI Resources (NR-52281). Virus propagation and titer was performed in VERO cells (USAMRIID) as described in PMID: 33657418. Briefly, VERO cells were maintained in DMEM supplemented with 10% FBS, 100 U/mL penicillin, and 100 U/mL streptomycin and incubated with either 0.1 MOI (virus propagation) or serial dilution of conditioned media (titer) for 1 h at 37C in DMEM only media for viral absorption. For viral propagation, conditioned media was harvested and aliquots were store in -80C. For titer, 10-fold serial dilutions of conditioned media (either from VERO cells or hiPSC-CMs) were incubated on VERO cells for 1 h at 37C. A 1:1 mixture of cellulose suspension (Sigma) and DMEM containing 4% heat-inactivated FBS, L-glutamine, 1X antibiotic-antimycotic (Gibco), and 220 mg/mL sodium pyruvate was layered on top of the cells and incubated at 37C for 48 h. Cellulose layer was then removed and cells were stained with 10% paraformaldehyde and stained with 0.5% crystal violet solution in 20% ethanol. Plaques were counted, and the virus titer in the original sample was assessed as plaque-formation unit per mL (PFU/mL).

### **Lysate preparation and Western blotting**

For western blotting of 293T cell lysates, traditional RIPA buffer was used to lyse cells. Lysates were normalized for cell concentration by BCA assay, and denatured by addition of Laemmli buffer (BioRad) at 95C for 5 minutes. Samples were then run on tris-glycine gels, followed by transfer onto PVDF membranes. Samples were blocked for 45 minutes with 5% milk in TBS + 0.1% Tween-20, and stained overnight at 4C in Pierce protein-free blocking buffer (Thermo-Scientific).

For cardiomyocyte lysates, cells at equivalent densities were first lysed in thiourea denaturing buffer (TU buffer: 8M urea, 2M thiourea, 50mM Tris-HCl pH 7.5, 3% SDS, 75mM DTT). Following incubation in TU buffer for 5 minutes, an equivalent volume of 50% glycerol was added to lysates for a final concentration of 4M urea, 1M thiourea, 25mM Tris HCl pH 7.5, 1.5% SDS, 25% glycerol and 37.5mM DTT and stored at -80C until western blotting. Samples were not heated so as to avoid urea decomposition, and subsequent carbamylation of proteins from cyanate ions. Phenol red powder was added directly to lysates for visualization. These denaturing, highly reducing conditions were crucial for solubilization of sarcomeric proteins. Lysates were run directly on tris-glycine or tris-acetate gels, transferred to PVDF membrane, and stained as described above.

## Imaging

Imaging was performed on a Zeiss LSM 710 confocal microscope at 63X. For sarcomere quantification, lengths of 400 sarcomeres were quantified for n=3 biological replicates. Images assignments were blinded during quantification.

## Antibodies

The following antibodies were used for western blotting. Dilutions were 1:1000 unless specified otherwise.

| <b>Protein</b>          | <b>Company</b>                             | <b>Cat#</b>         |
|-------------------------|--------------------------------------------|---------------------|
| Alpha actinin (EA-53)   | Abcam                                      | ab9465              |
| Alpha actinin (EP2529Y) | Abcam                                      | ab68167             |
| MYH6                    | Sigma Aldrich                              | HPA001349           |
| MYH7                    | Sigma Aldrich                              | M8421               |
| Notch1                  | EmdMillipore                               | MAB5352, clone mn1a |
| Notch1                  | Abcam                                      | ab52627, EP1238T    |
| Notch2                  | CST                                        | 5732, clone D76A6   |
| Obscurin                | Gift from Dr. Kontragianni-Konstantapoulos |                     |
| Obscurin                | Gift from Dr. Kontragianni-Konstantapoulos |                     |
| Obscurin                | EmdMillipore                               | ABT160              |
| Obscurin                | EmdMillipore                               | MABT332, Clone 4a8  |
| Obscurin                | EmdMillipore                               | MABT126, clone 510A |
| Obscurin                | Sigma (Prestige)                           | HPA019497           |
| Obsl1                   | Abcam                                      | ab204075            |
| SARS-COV/COV2 3CLPro    | Cell Signaling                             | 51661               |
| SARS-COV2 nucleocapsid  | GeneTex                                    | GTX135357           |
| SARS-COV2 nucleocapsid  | R & D Systems                              | MAB10474            |
| StrepMAB classic        | IBA LifeSciences                           | 2-1507-001          |
| StrepMAB classic-HRP    | IBA LifeSciences                           | NC9789296           |
| SVIL                    | Sigma (Prestige)                           | HPA020138           |
| TAB1                    | CST                                        | 3226, clone C25E9   |
| Thrombin                | Novus Biologicals                          | NBP1-58268          |
| Tnnt2 (13-11)           | BD                                         | 564766              |

Tnnt2-647 conjugate  
UACA

BD  
BethylLaboratories

565744  
A301-383A

### **Statistics**

Statistics were calculated with Prism9.
